# Supplementary material for: Contribution of the Two Genes Encoding Histone Variant H3.3 to Viability and Fertility in Mice
Source: PubMed Central journal article supplement (PMC4335506; doi:10.1371/journal.pgen.1004964), 2015-02-12
Supplement: pgen.1004964.s001.pdf [file pgen.1004964.s001.pdf]

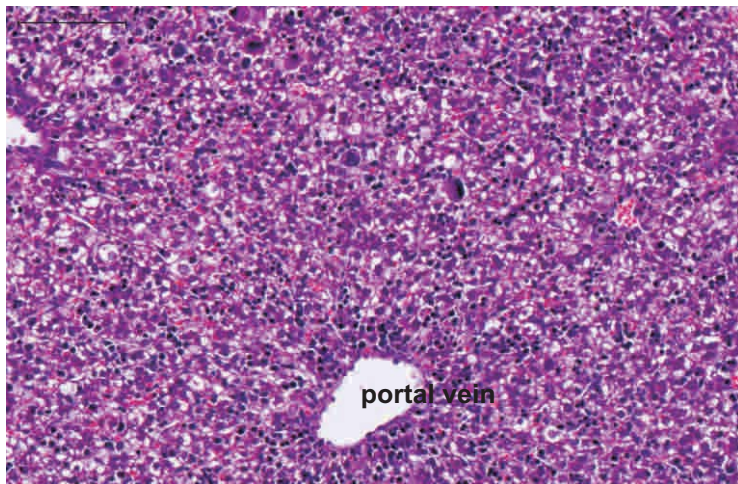

#1 control Liver x20 29612

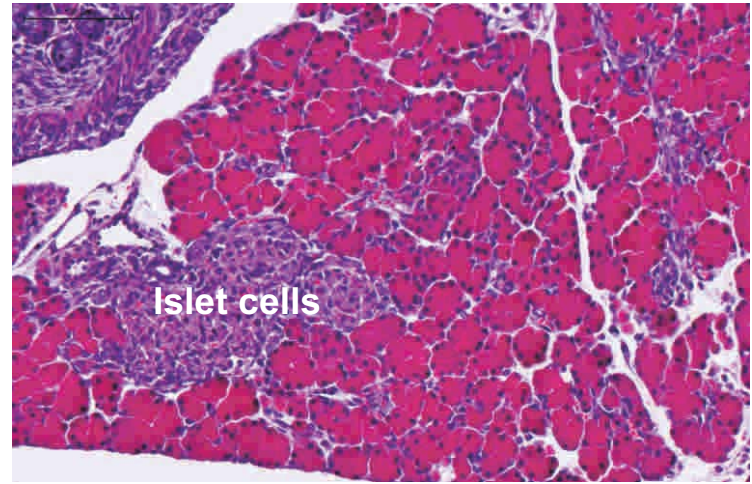

#1 control pancreas x20 29612

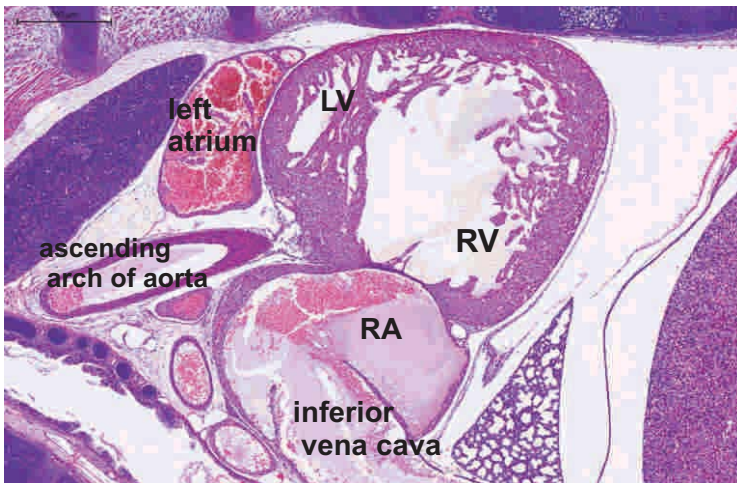

#1 control heart x5 29612

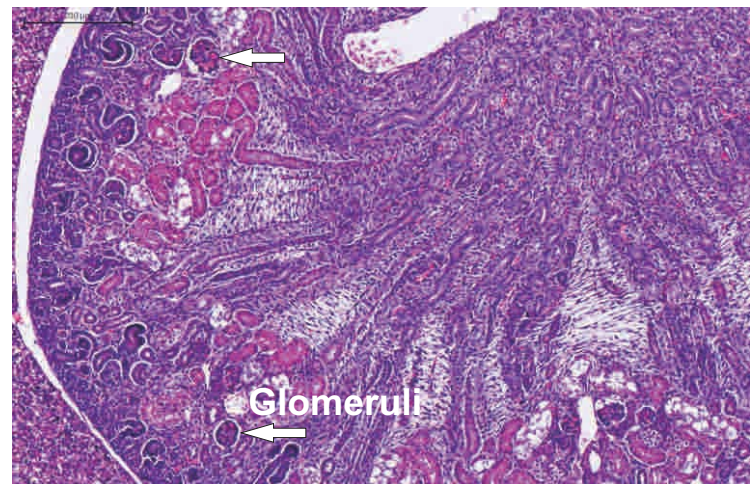

#1 control kidney x10 29612

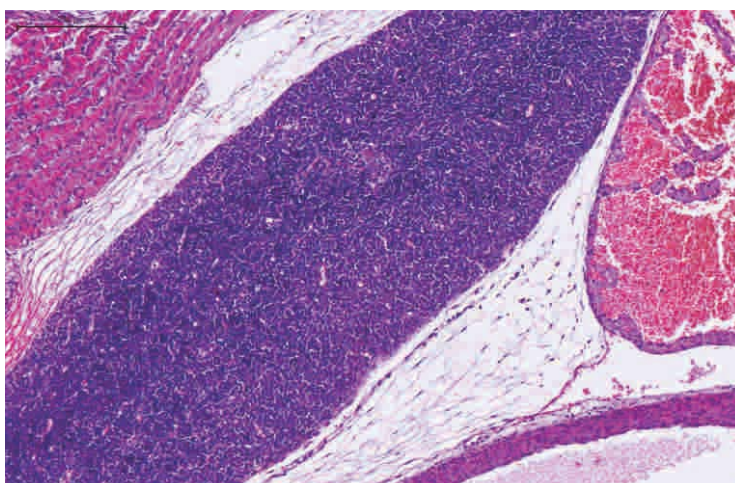

#1 control thymus x10 29612

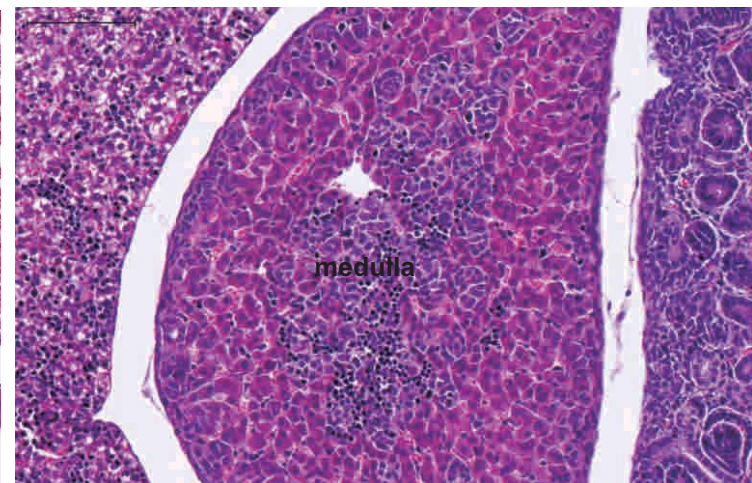

#1 control adrenal gland x20 29615

# APN13/052MCRI

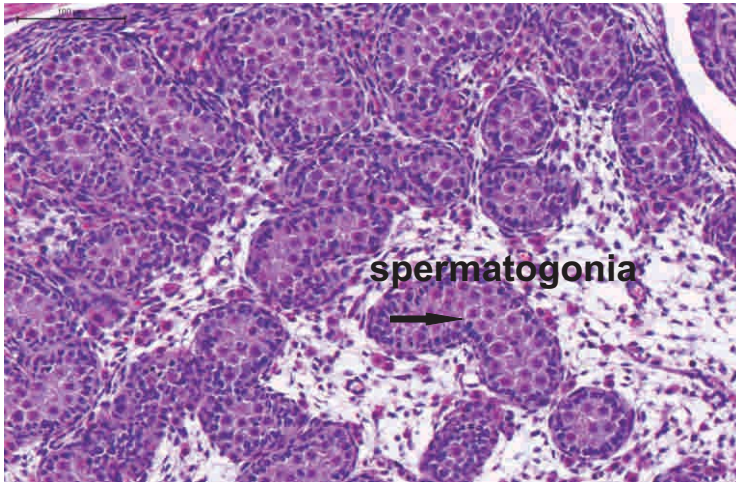

#1 control testis x20 29615

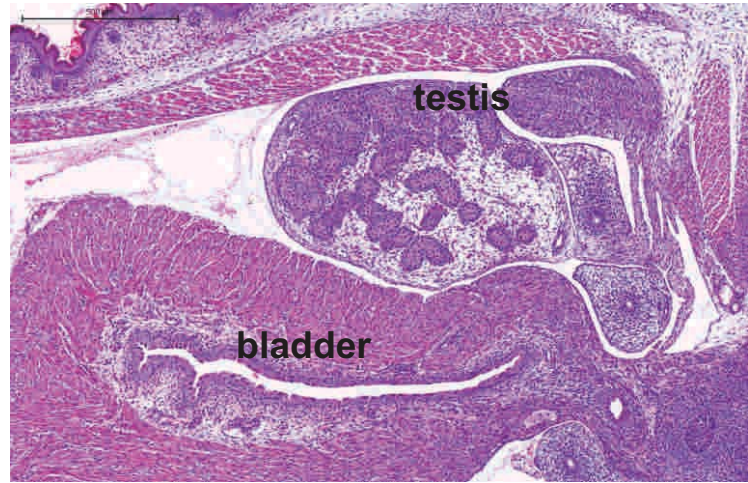

#1 control bladder & testis x5 29615

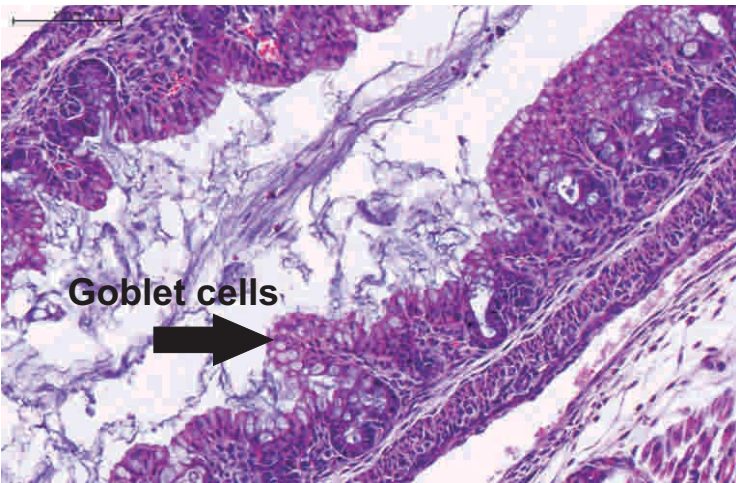

#1 control colon x20 29615

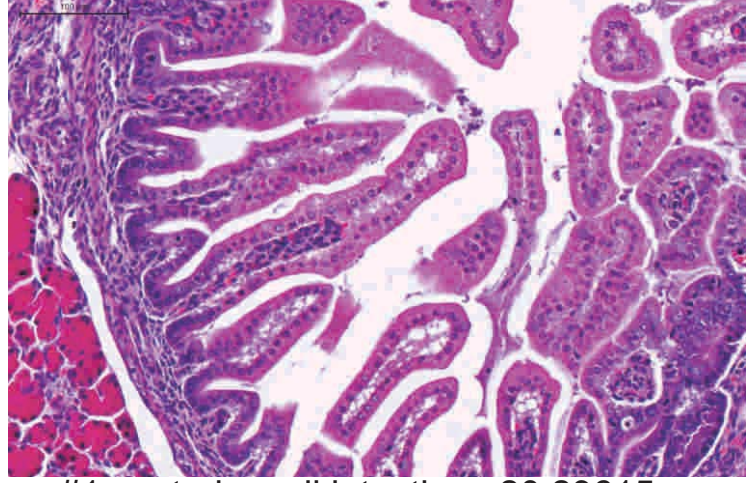

#1 control small intestine x20 29615

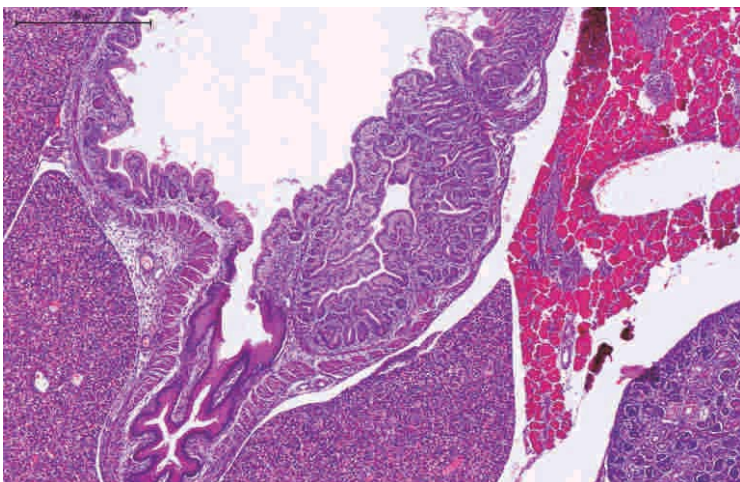

#1 control stomach x5 29624

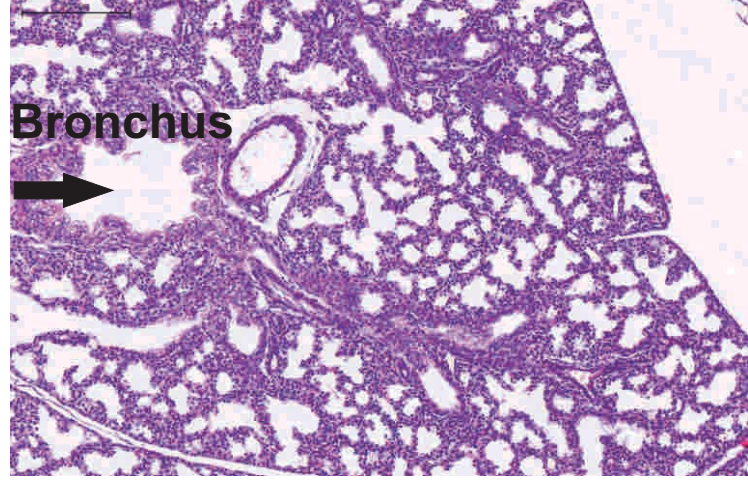

#1 control lung x10 29615

# APN13/052MCRI

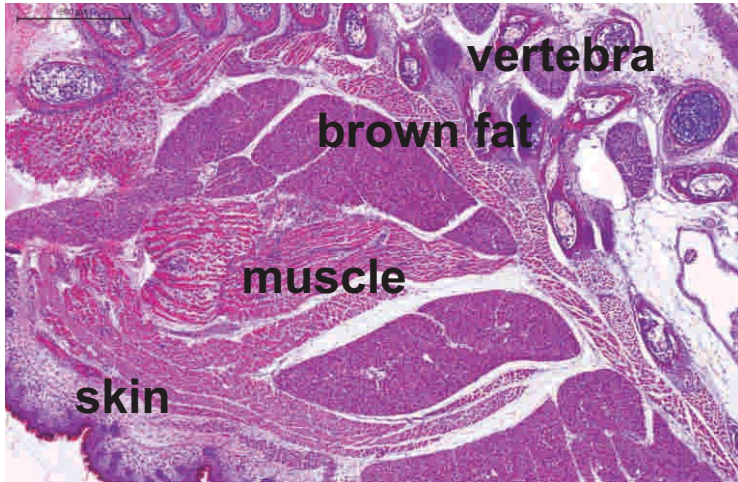

#1 control skin brown fat & vertebra x5 29621

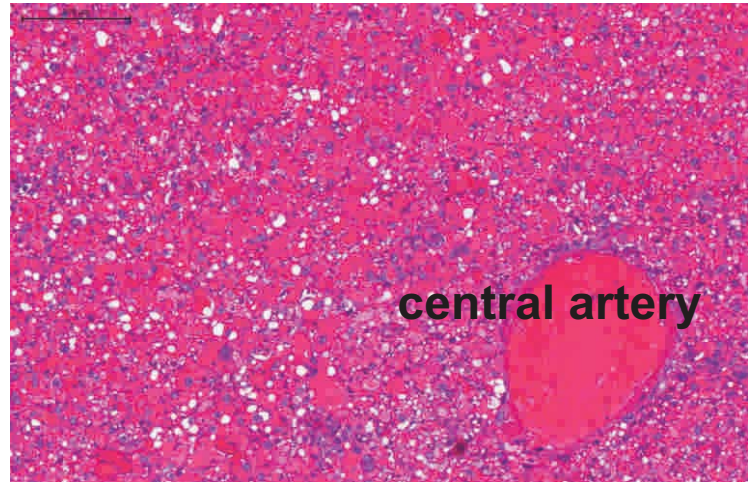

#1 cont placenta-decidua x10 29620

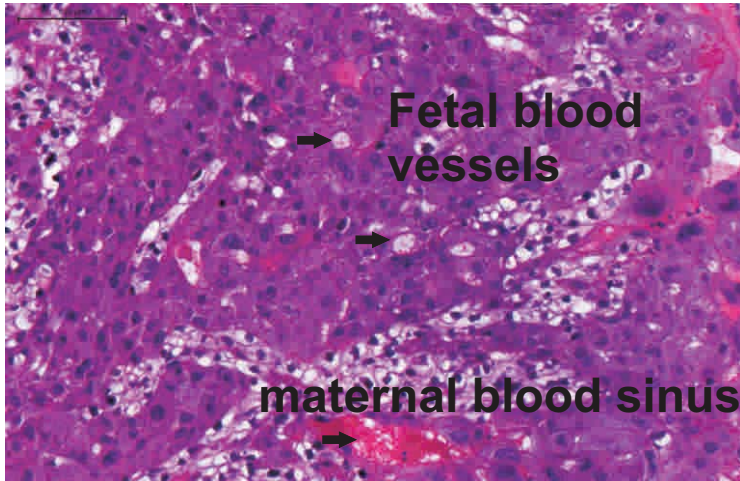

#1 control placenta- labyrinth x20 29614

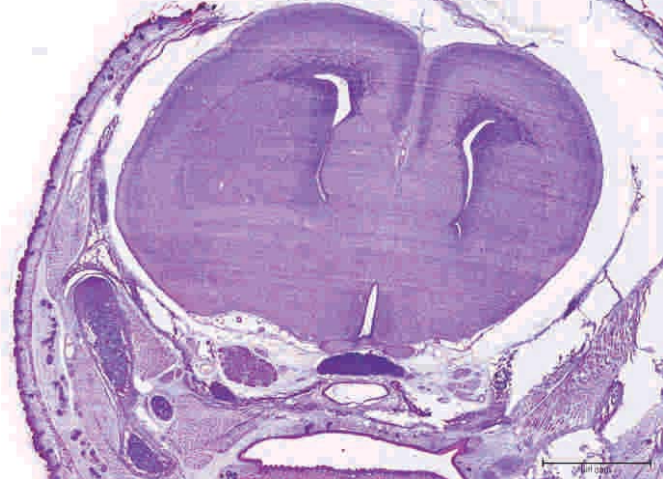

#1 cont forebrain x2 29632

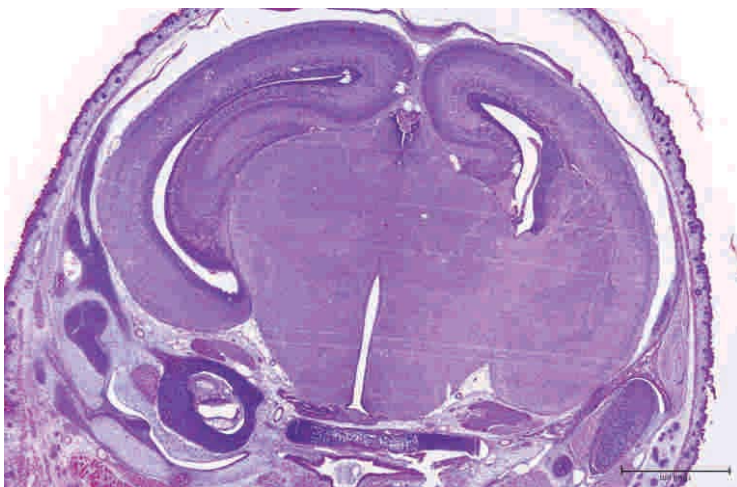

#1 cont mid brain x2 29635  
Note: oblique plane

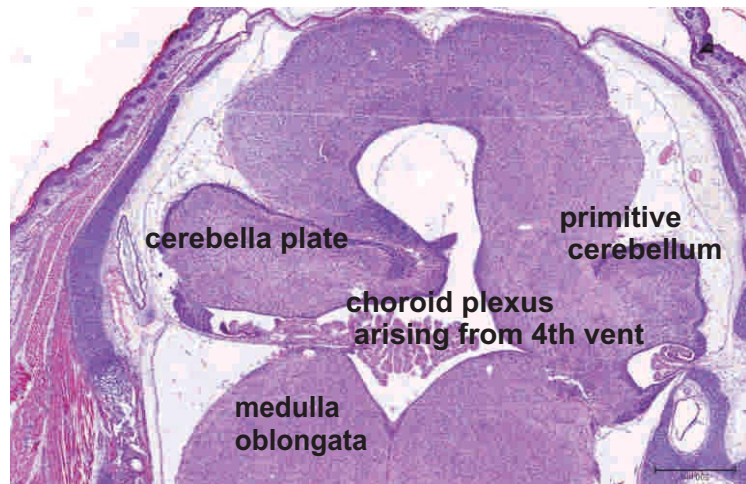

#1 cont developing cerebellum  
x3 29642

# APN13/052MCRI

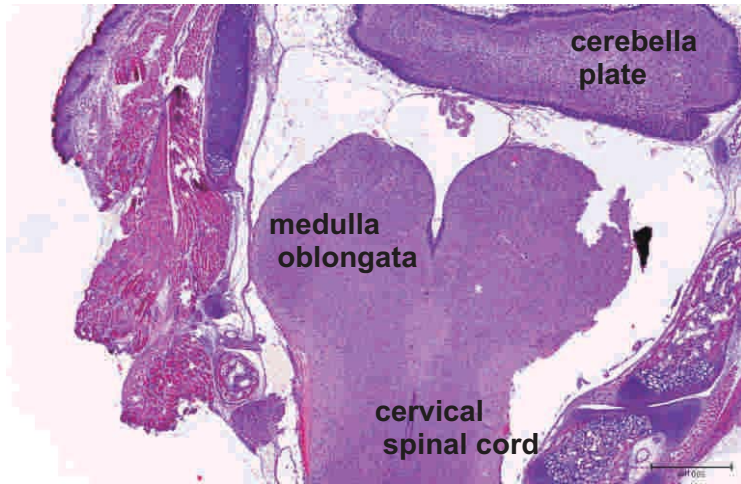

#1 cont hind brain x3 29644

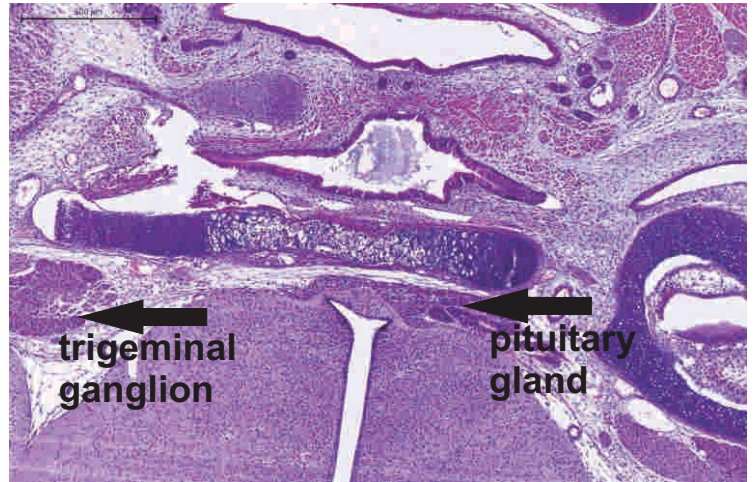

#1 control pituitary gland x10 29635

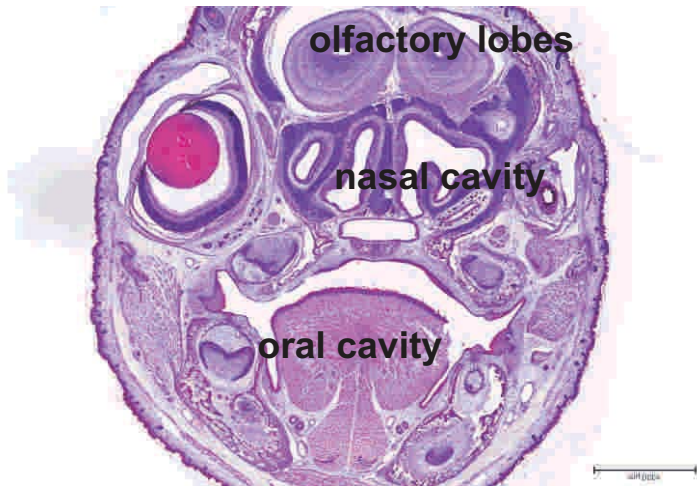

#1 olfactory lobes & eye x2 29628

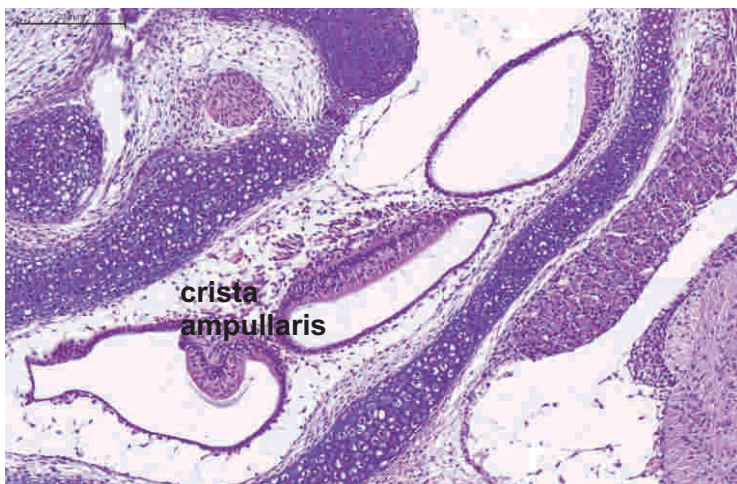

#1 cont semicircular canals  
x10 29639

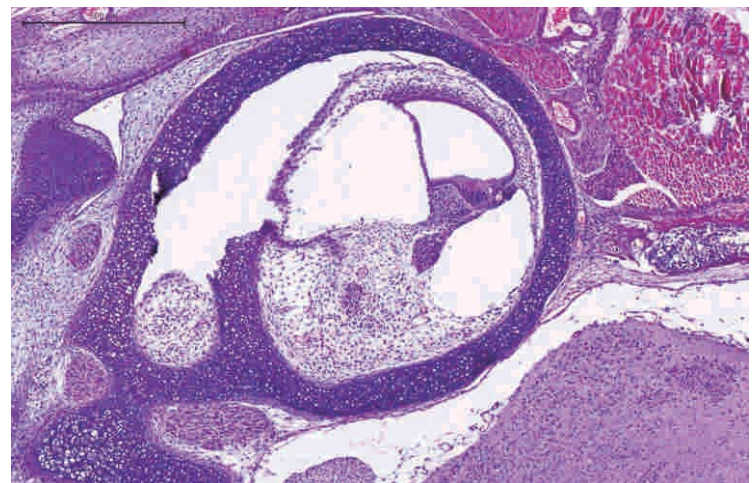

#1 cont developing  
cochlea x10 29638

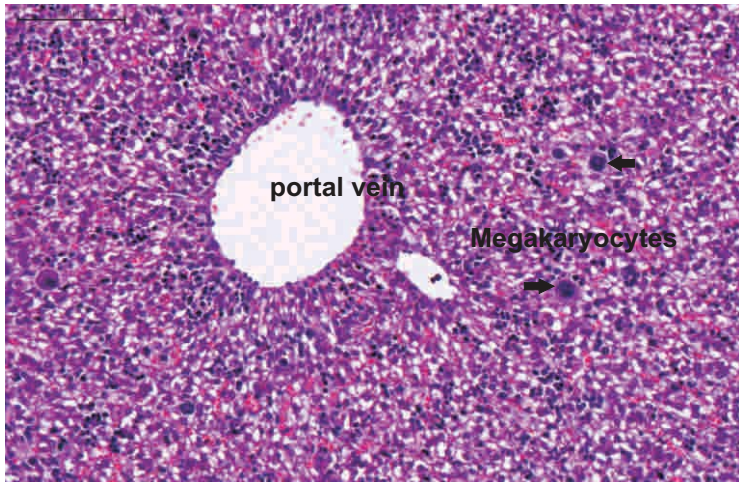

#2 Liver x20 29648

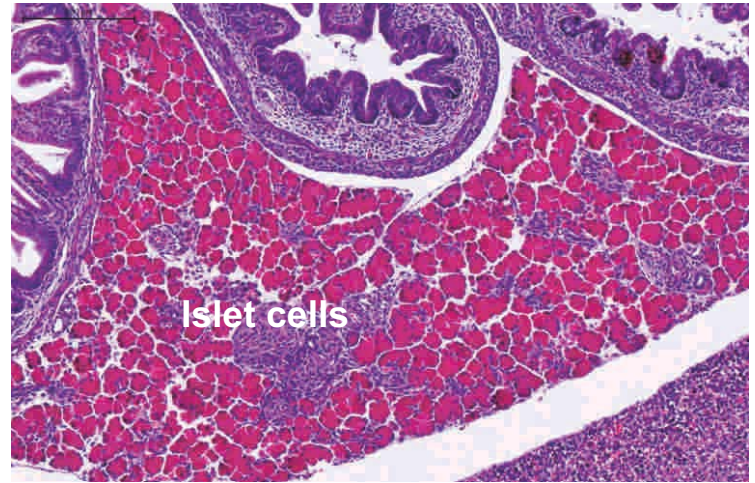

#2 Pancreas x10 29657

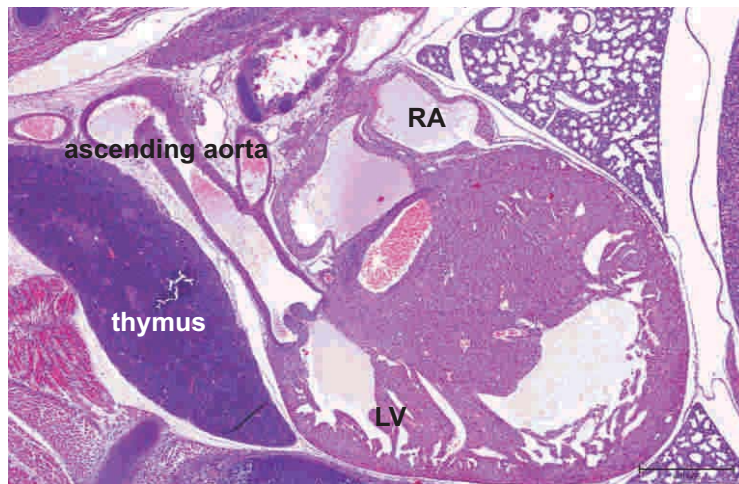

#2 Heart x5 29645

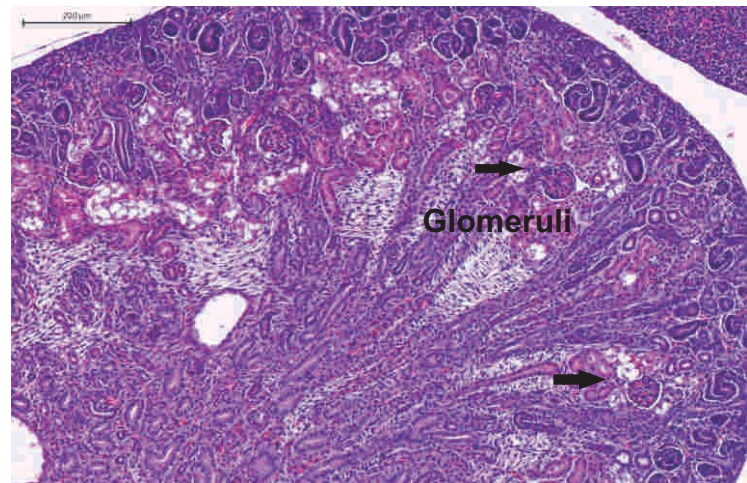

#2 Kidney x10 29648

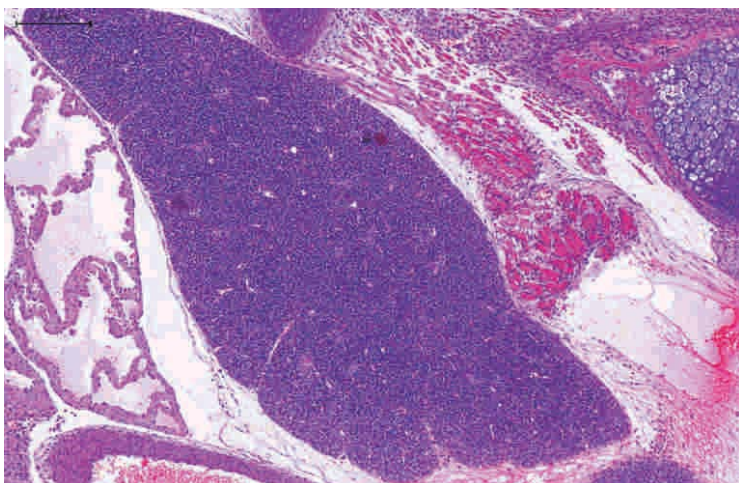

#2 Thymus x5 29649

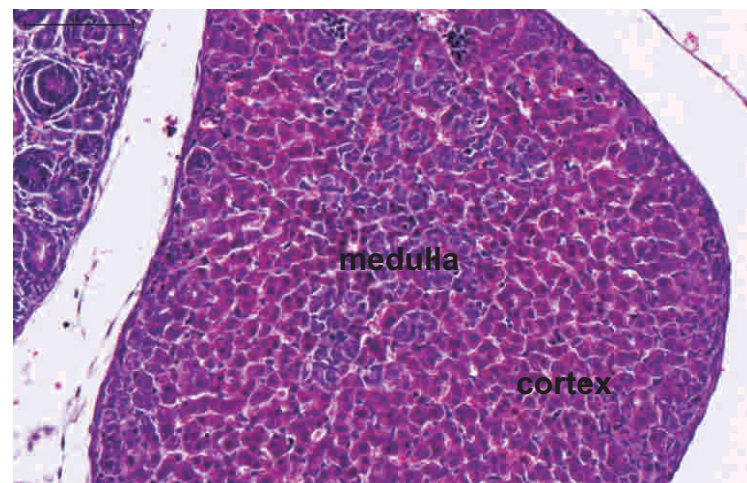

#2 Adrenal gland x10 29647

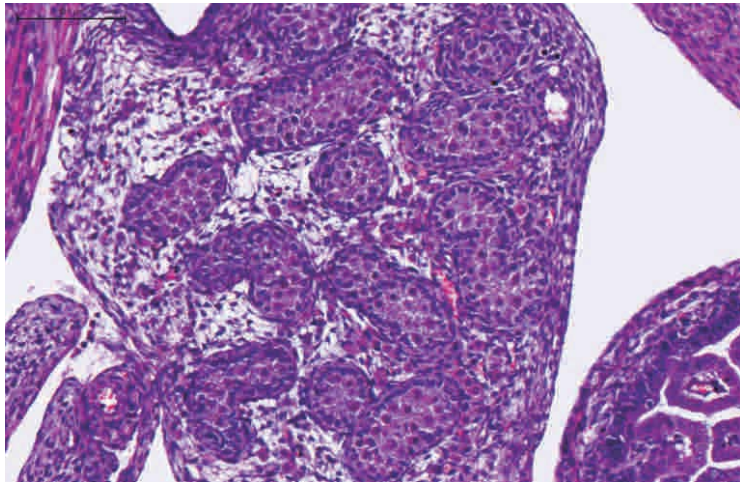

#2 Testis x20 29645

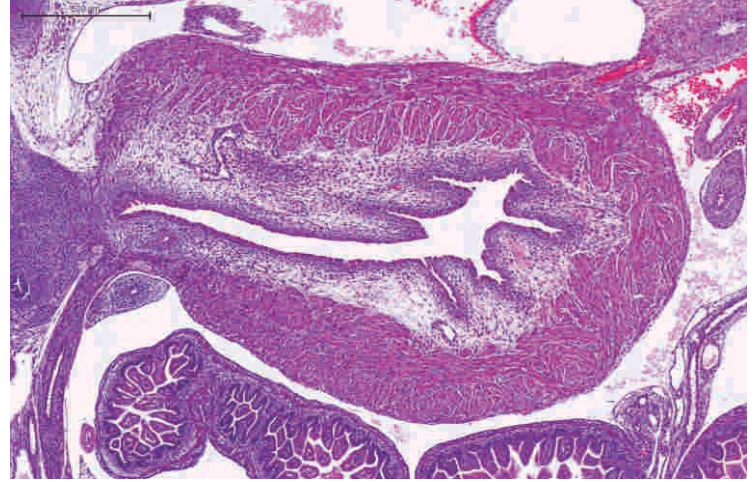

#2 Bladder x10 29648

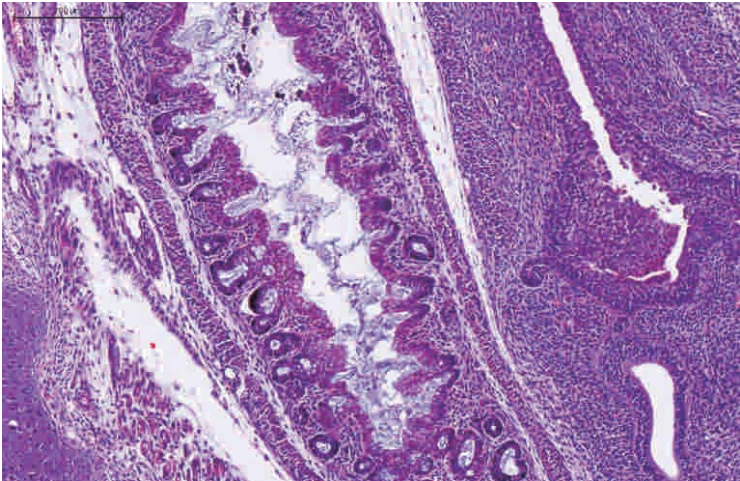

#2 Colon x10 29649

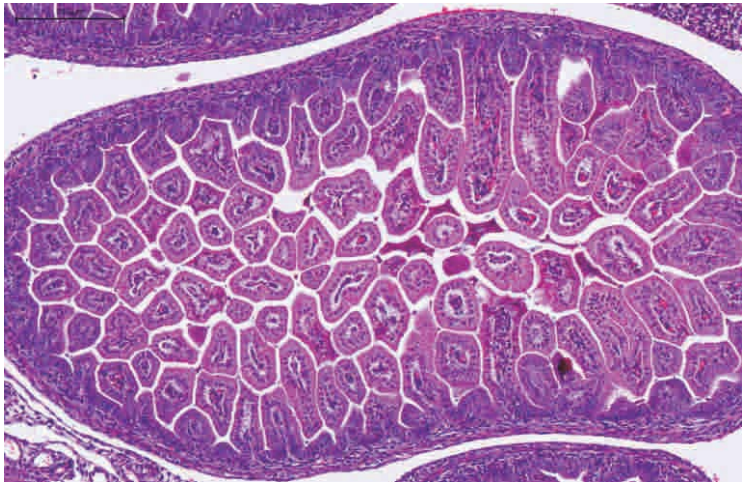

#2 Small intestine x10 29649

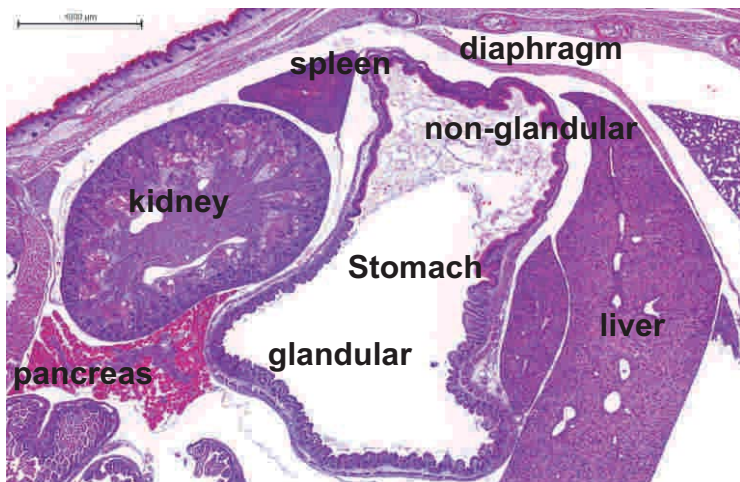

#2 Stomach 29648

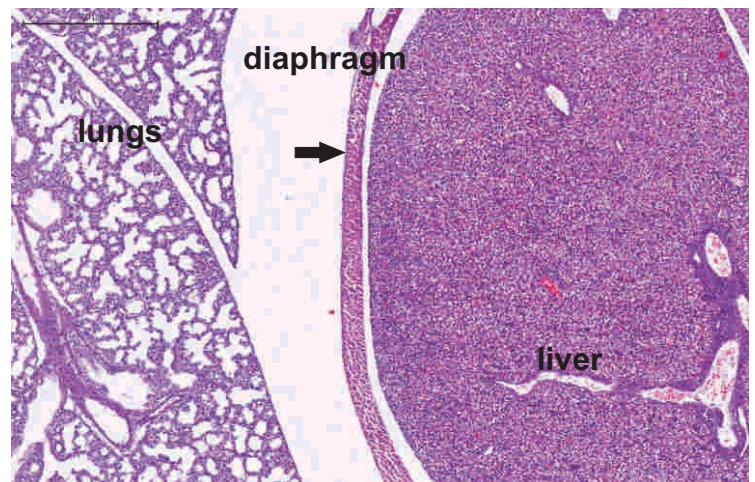

#2 Diaphragm x5 29656

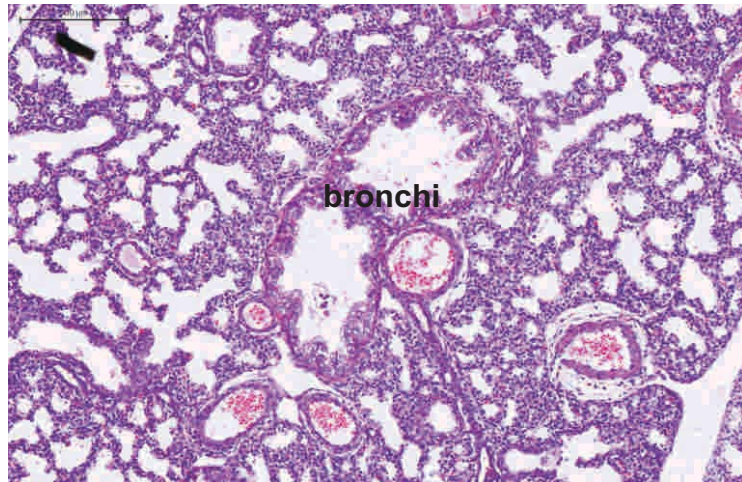

bronchi

#2 lung x10 29656

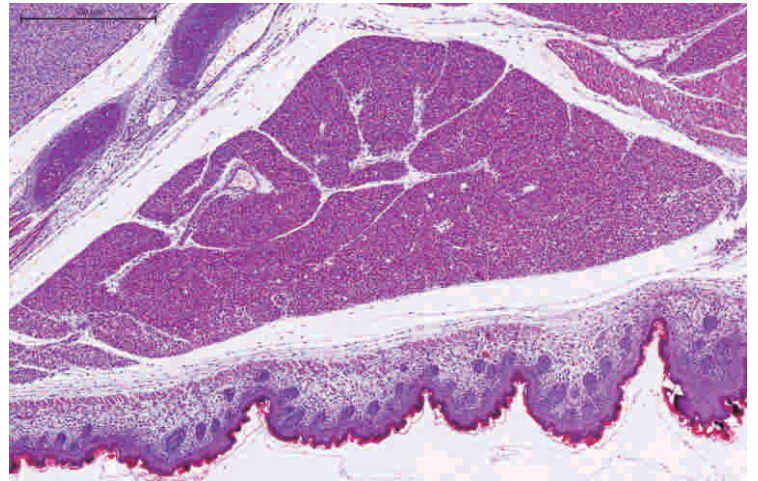

#2 skin and brown fat x5 29649

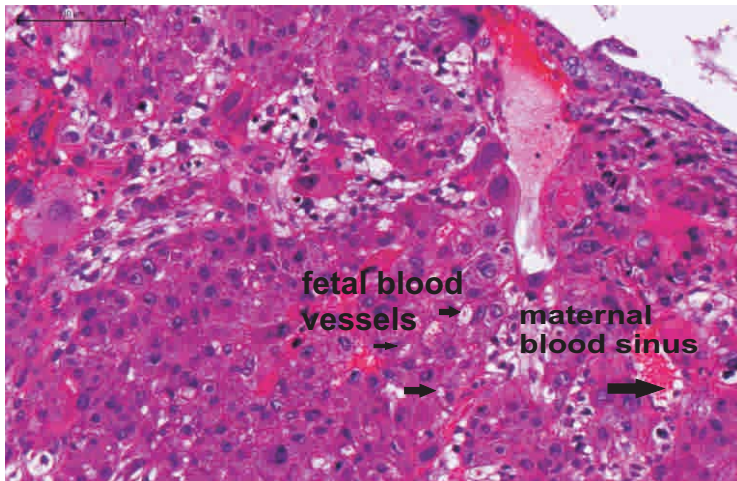

fetal blood vessels  
maternal blood sinus

#2 placenta labyrinth x20 29655

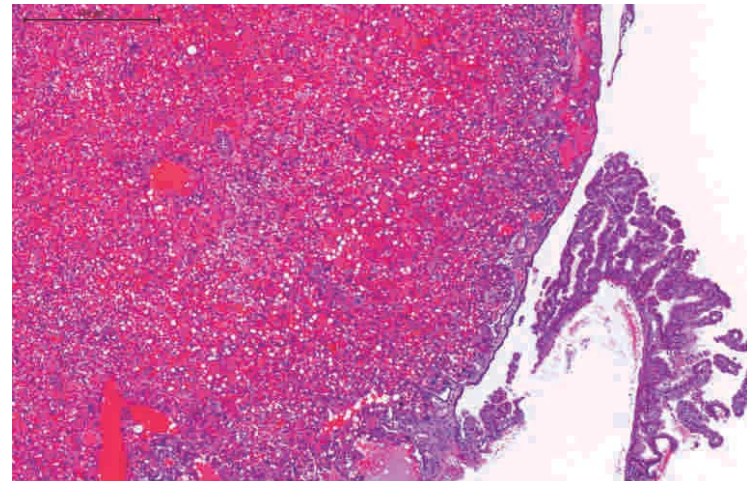

#2 placenta-deciduax5 29648

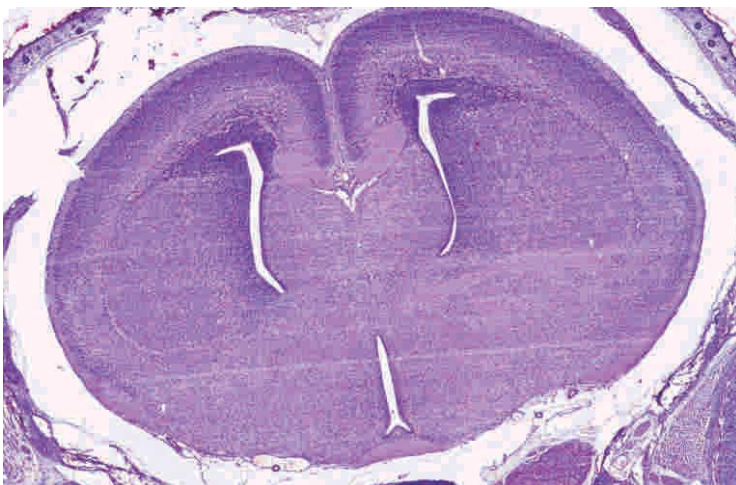

#2 forebrain x3 29667

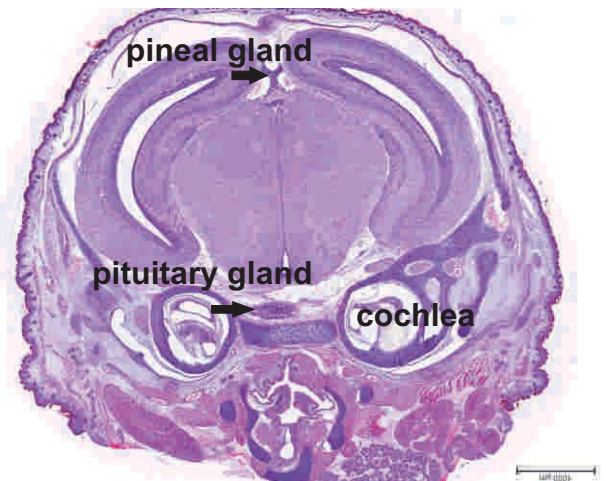

#2 midbrain x2 29671

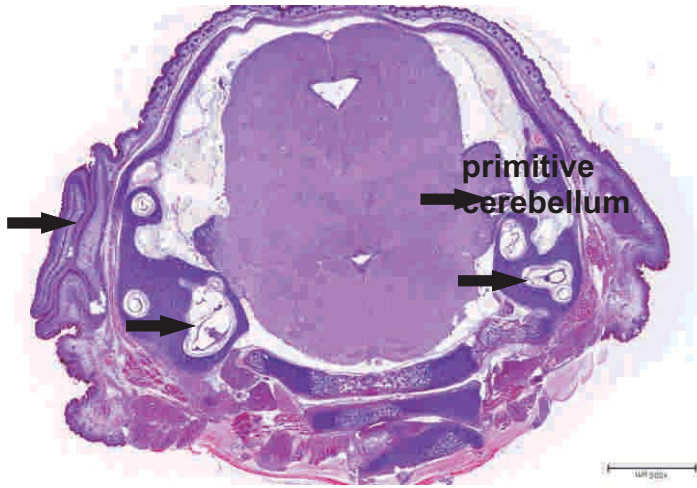

#2 semicircular canal & pina x2 29677

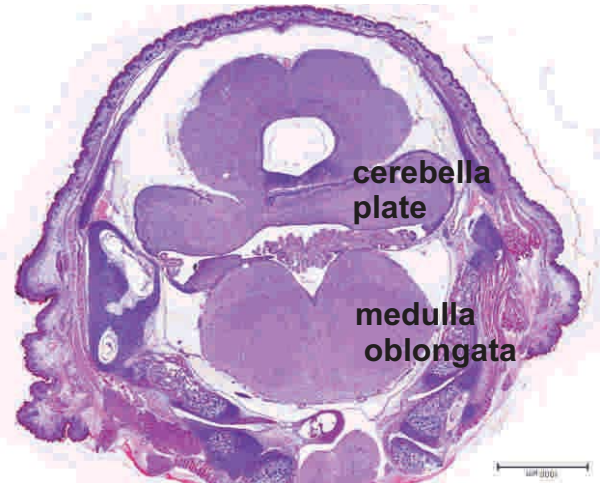

#2 cerebellum x2 29677

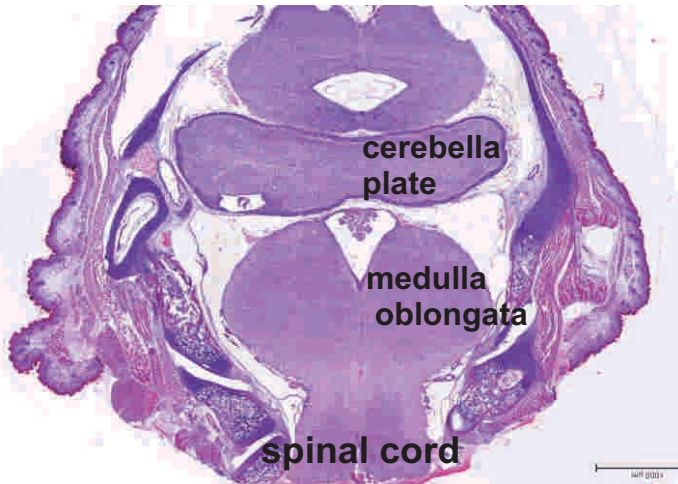

#2 hindbrain x2 29678

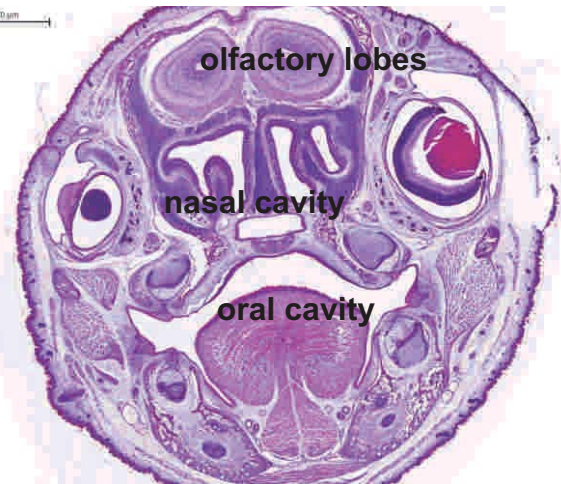

#2 nasal & oral cavity  
x2 29663

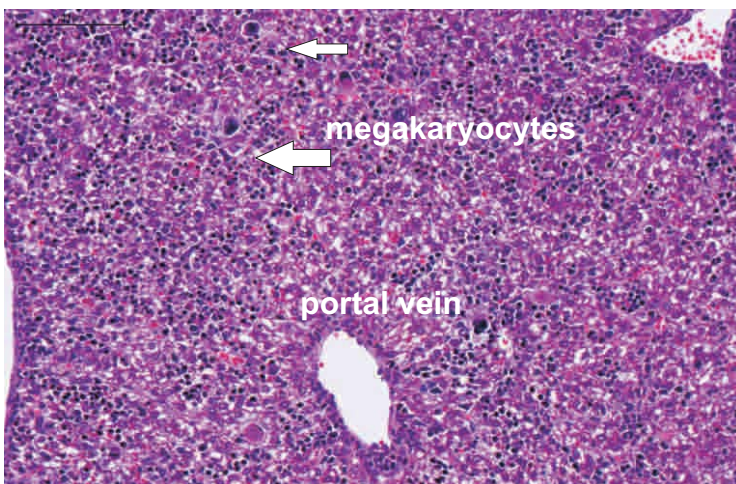

#3 liver x20 29701

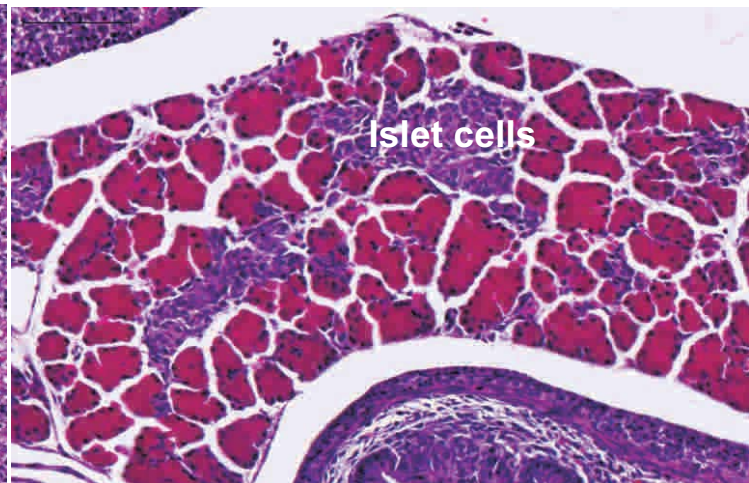

#3 pancreas x20 29685



# APN13/052MCRI

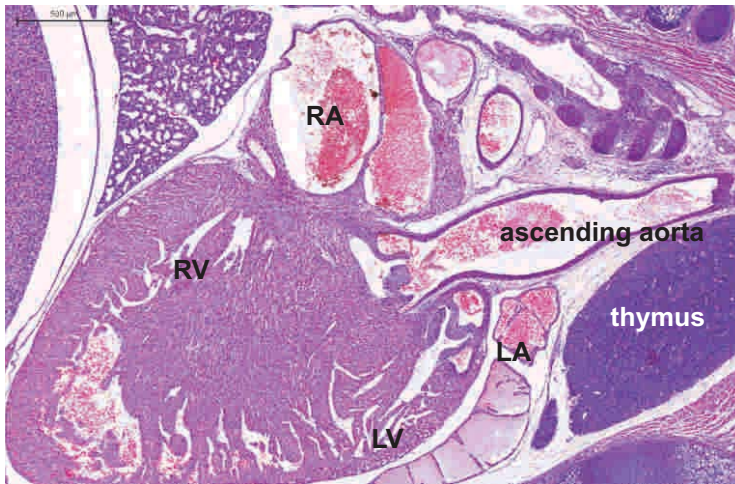

#3 Heart x5 29689

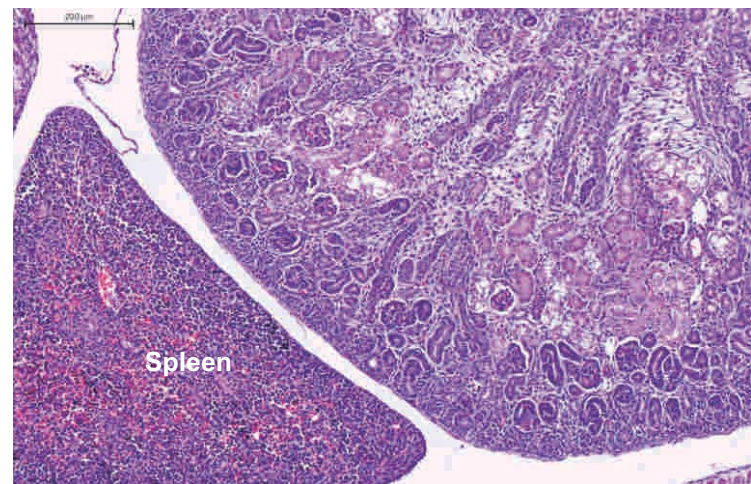

#3 Kidney & Spleen x10 29703

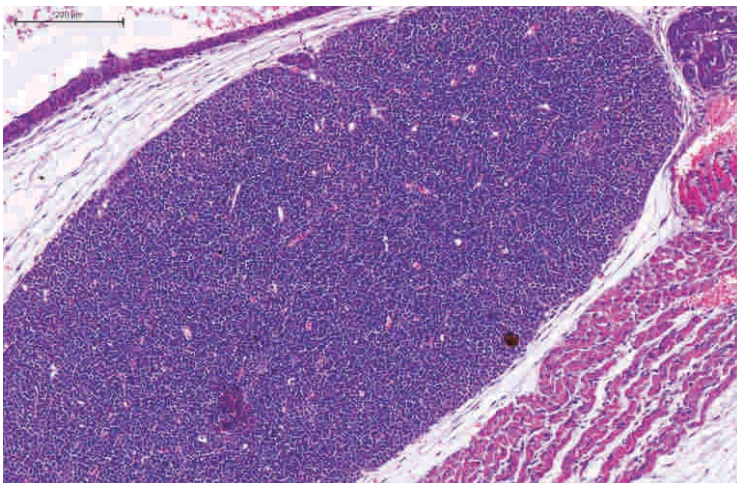

#3 Thymus x10 29687

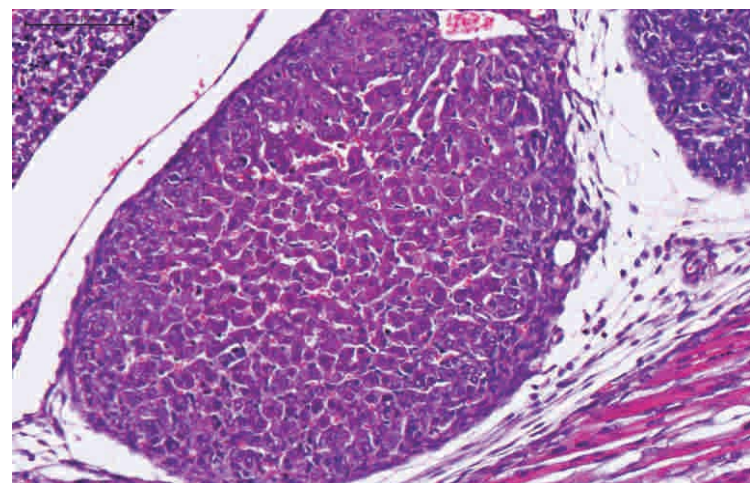

#3 Adrenal gland x20

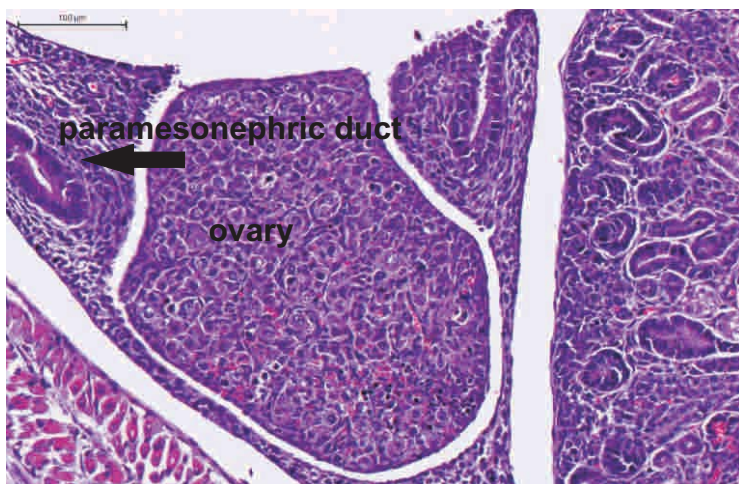

#3 ovary with  
typical "dotted" morphology x20 29687

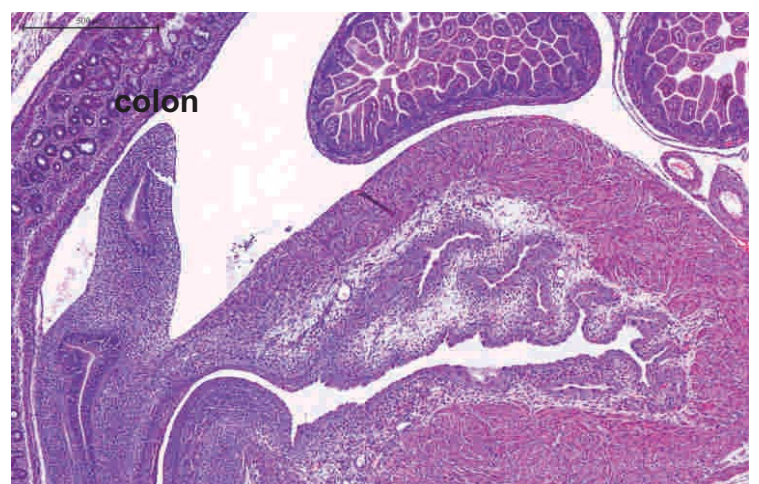

#3 bladder & colon x5 29681

# APN13/052MCRI

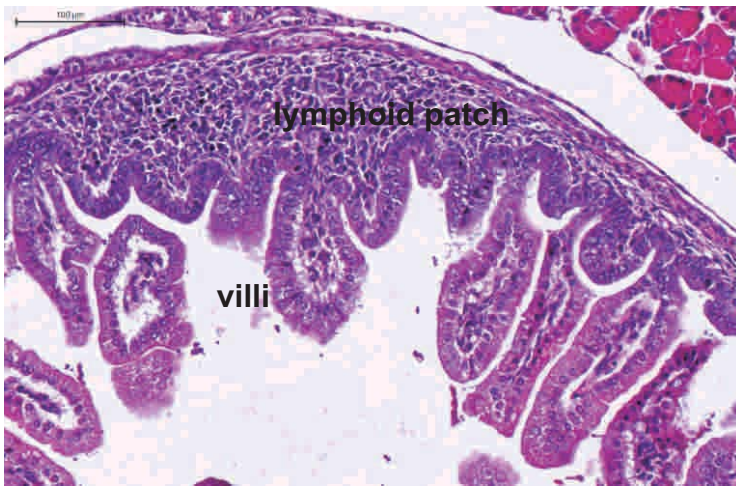

#3 small intestine x20 29693

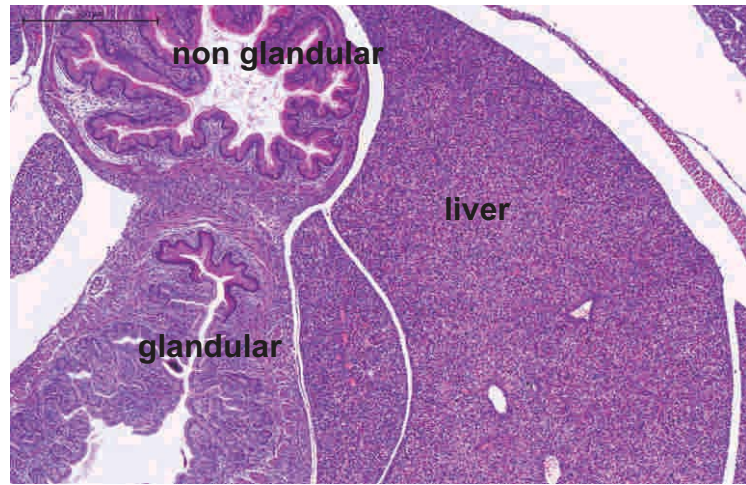

#3 stomach x5 29701

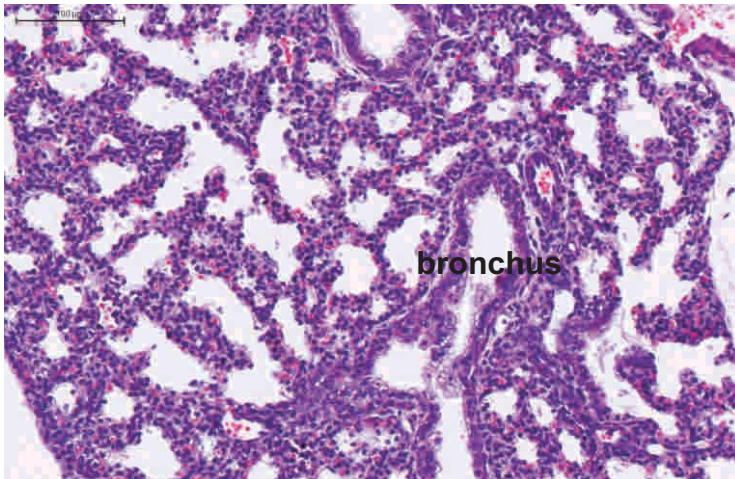

#3 lung x20 29701

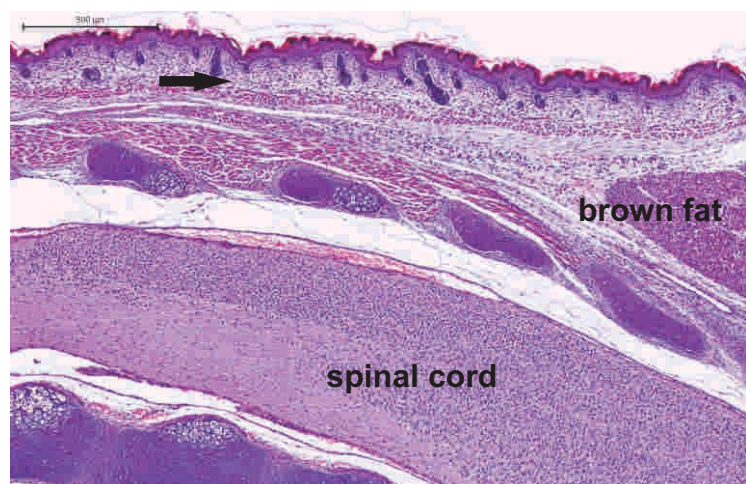

#3 skin & brown fat x5 29693

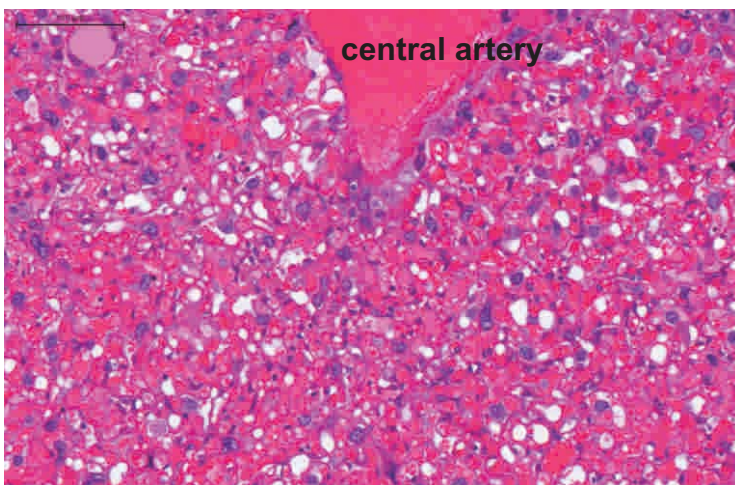

#3 placenta-decidua x20 29701

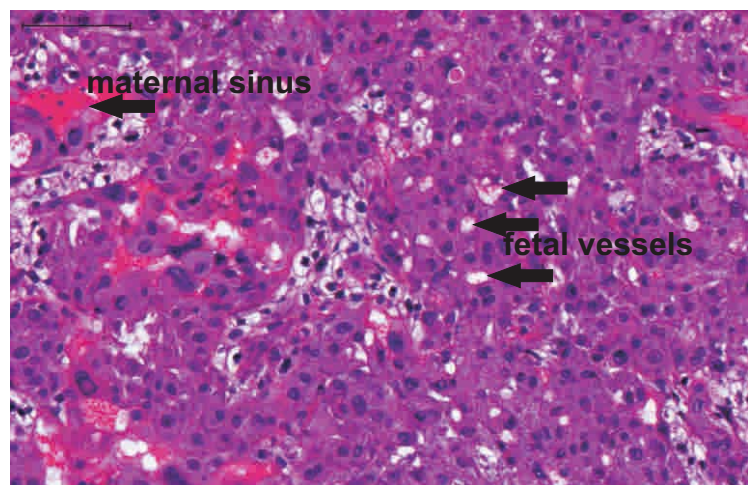

#3 placenta-labyrinth x20 29681

APN13/052MCRI

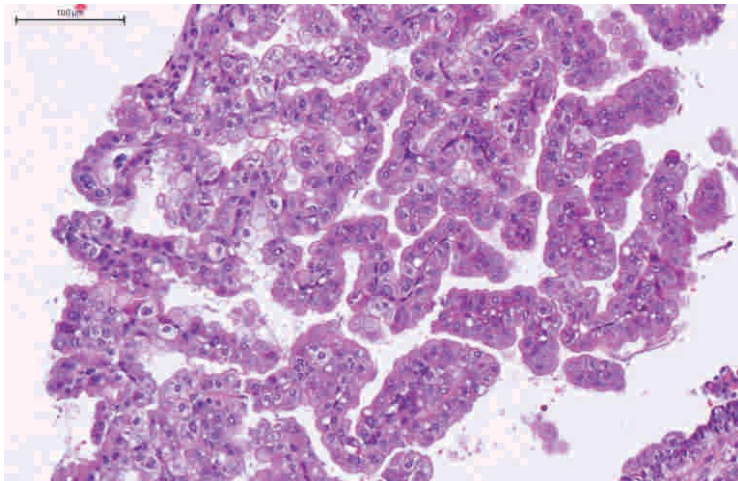

#3 yolk sac x20 29701

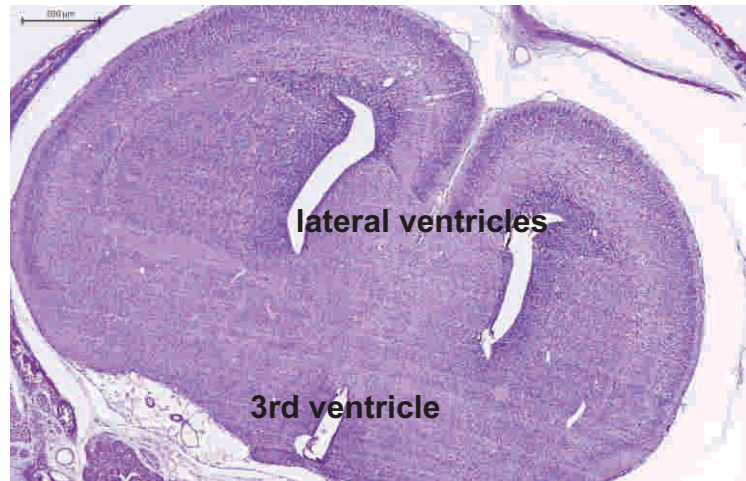

#3 forebrain x3 29696

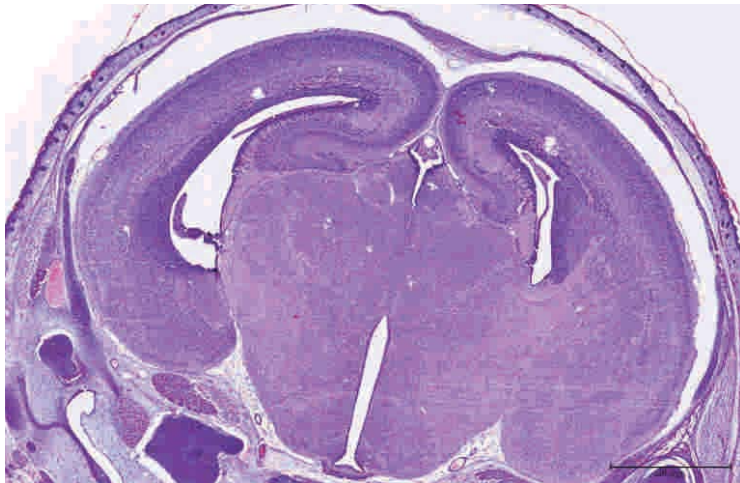

#3 midbrain x2 29702

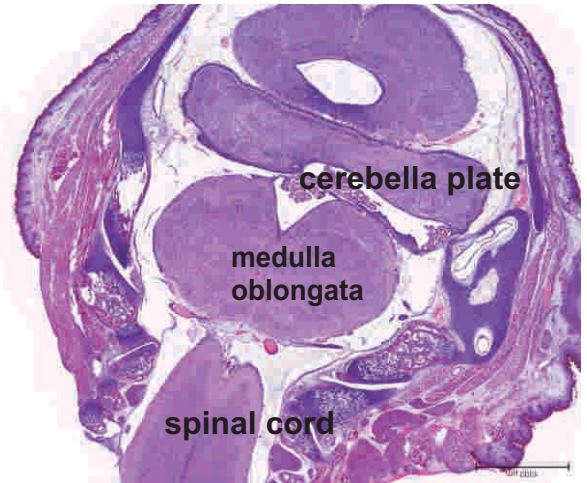

#3 hindbrain x2 29714

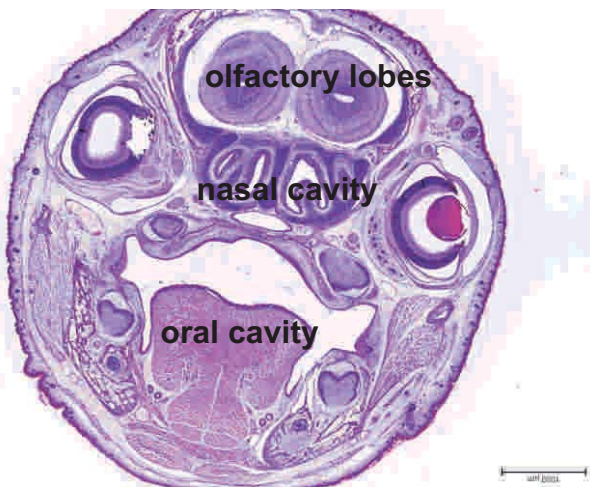

#3 Head(rostral) x2 29690

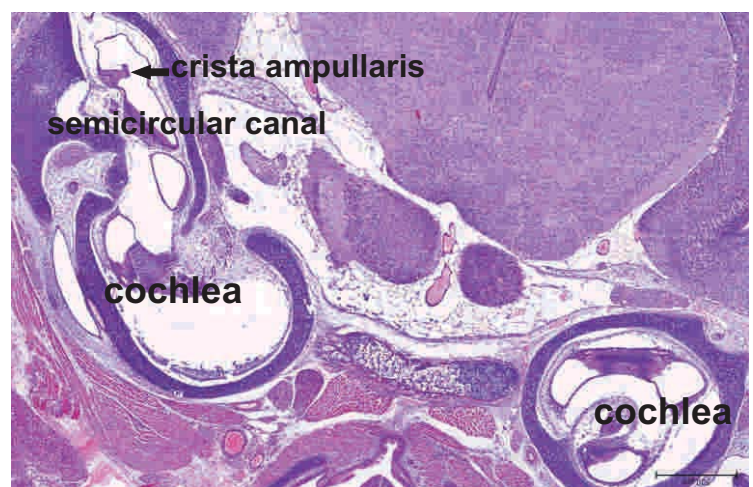

#3 inner ear x3 29706

# APN13/052MCRI

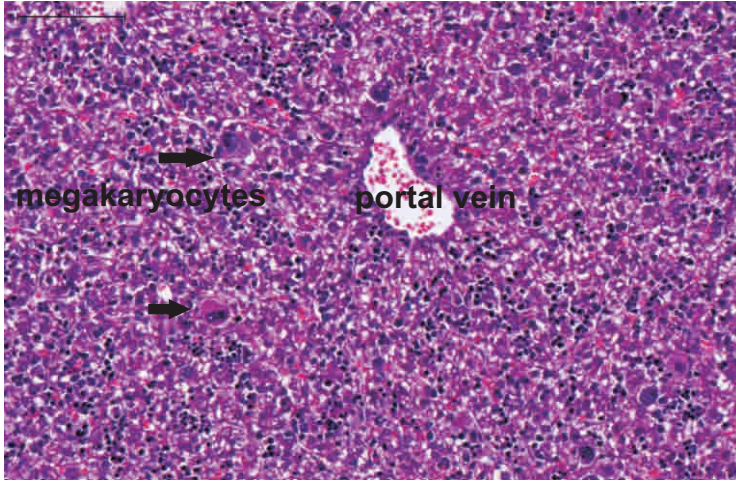

#4 Liver x20 29715

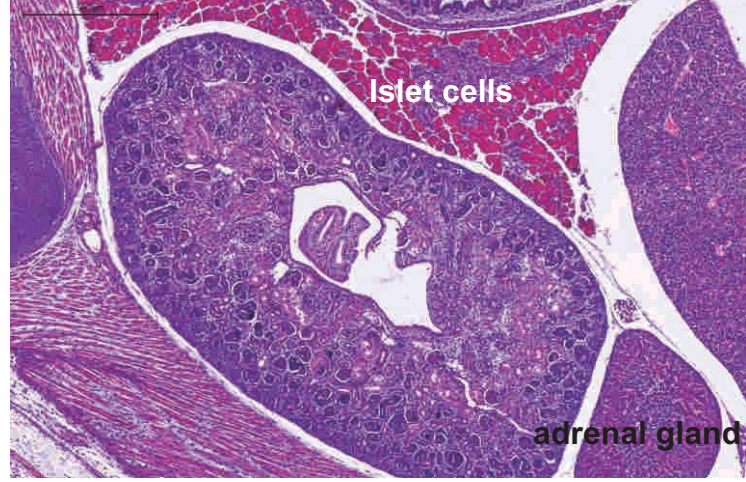

#4 kidney, adrenal gland  
& pancreas x5 29715

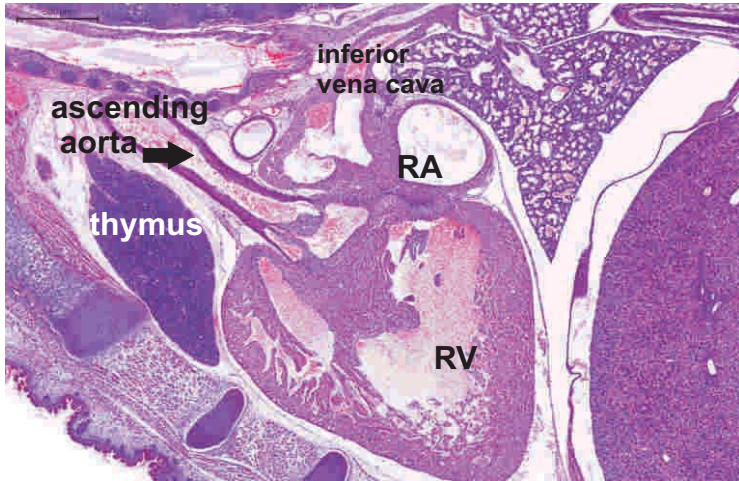

#4 Heart x2 29725

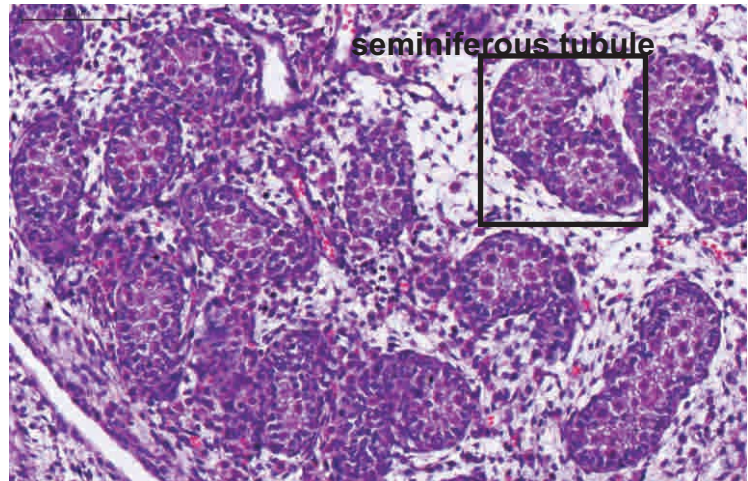

#4 Testis x20 29715

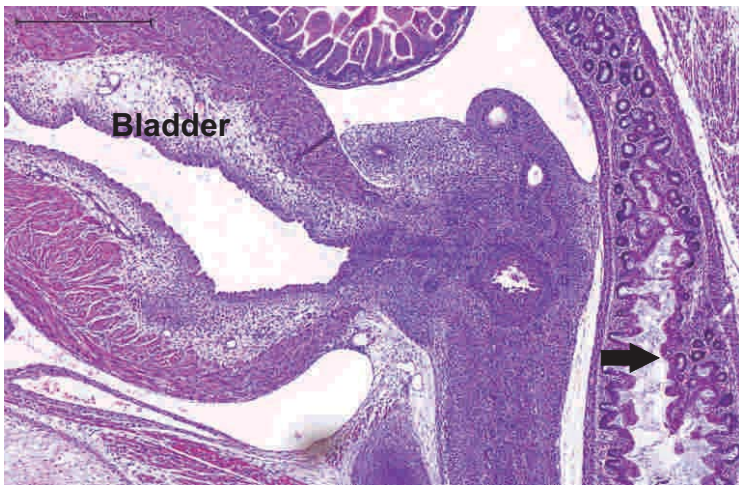

#4 Bladder & colon x5 29725

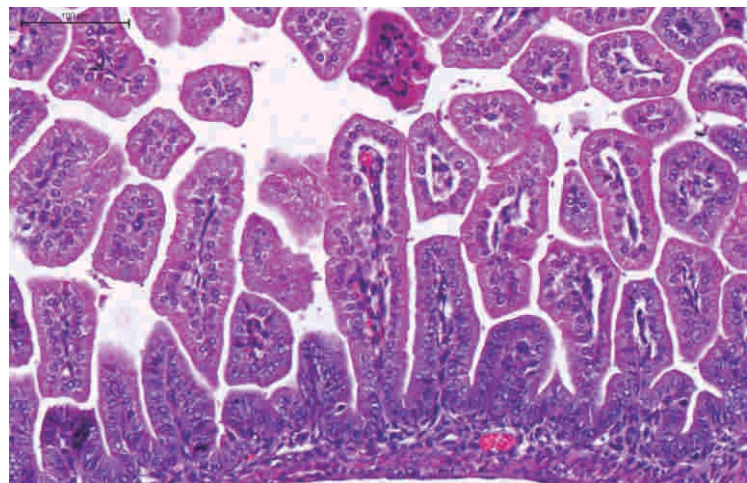

#4 Small intestine x20 29725

APN13/052MCRI

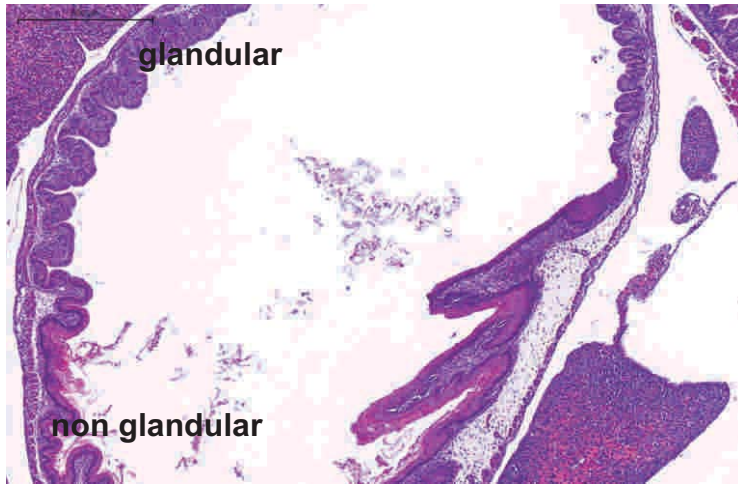

#4 Stomach x5 29725

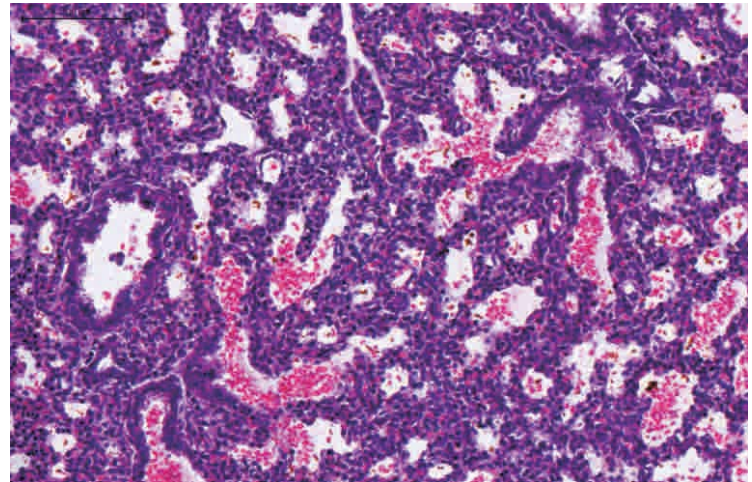

#4 lung x20 29715

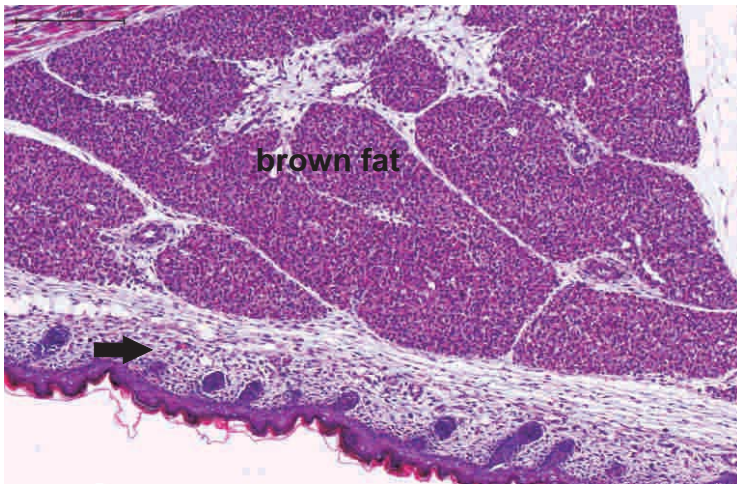

#4 Skin & brown fat x10 29731

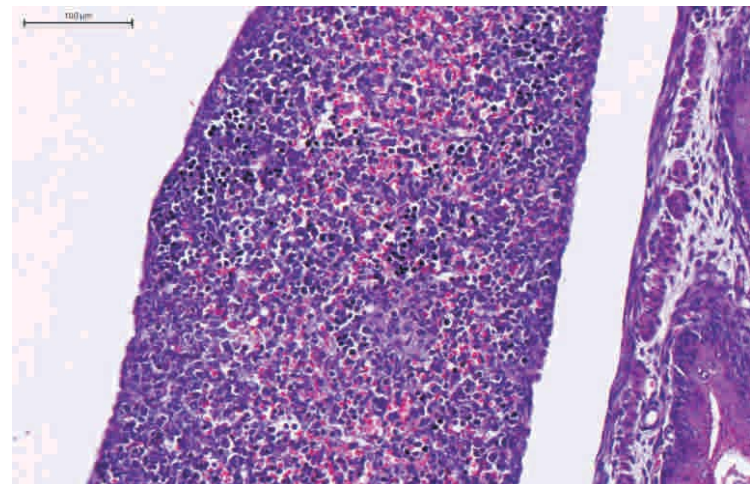

#4 Spleen x20 29731

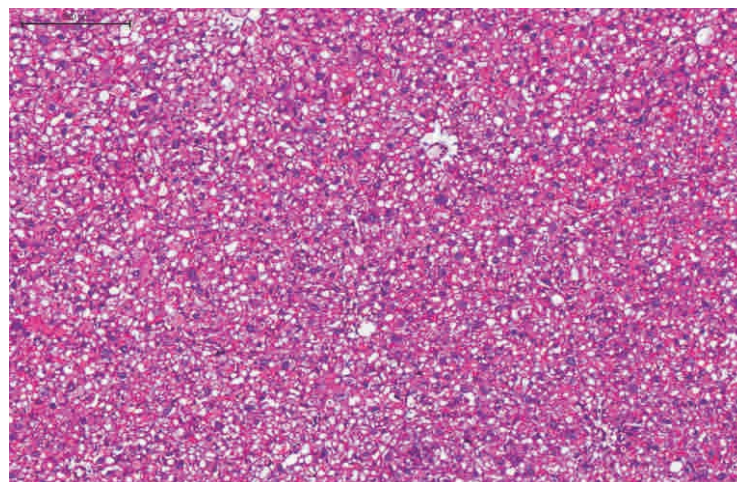

#4 Placenta- decidua x10 29731

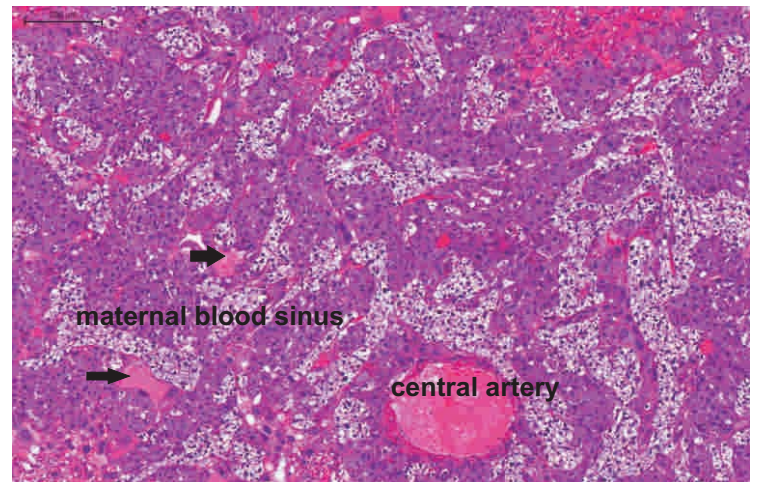

#4 Placenta-labyrinth x7 29725

APN13/052MCRI

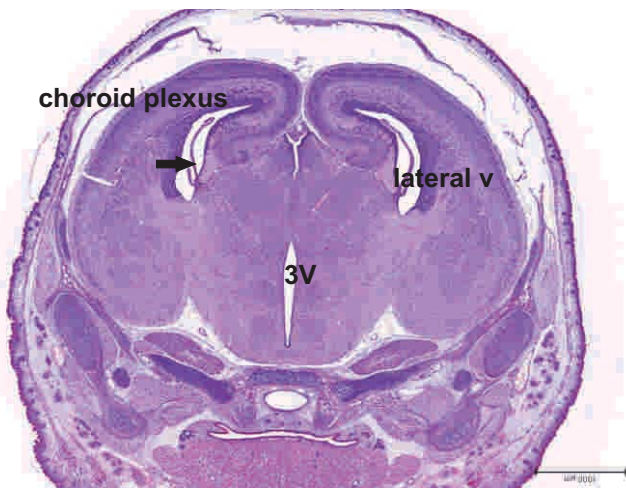

#4 Midbrain x2 29732

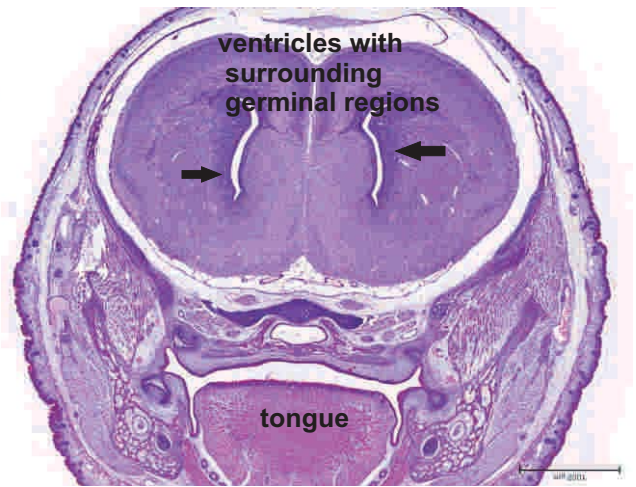

#4 Forebrain x2 29726

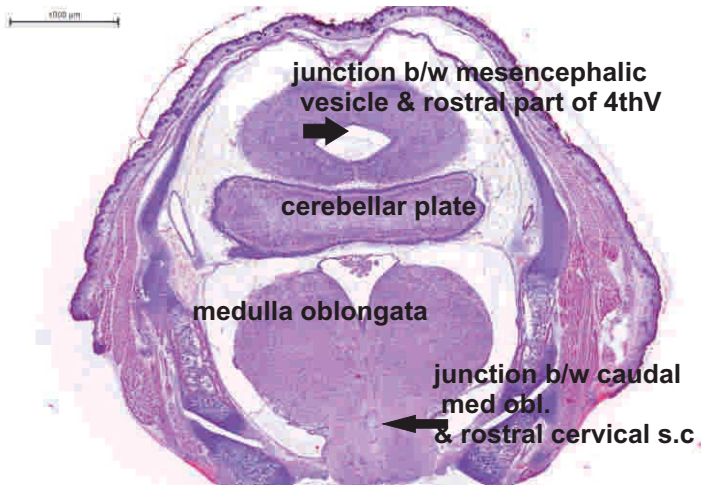

#4 hindbrain x2 29747

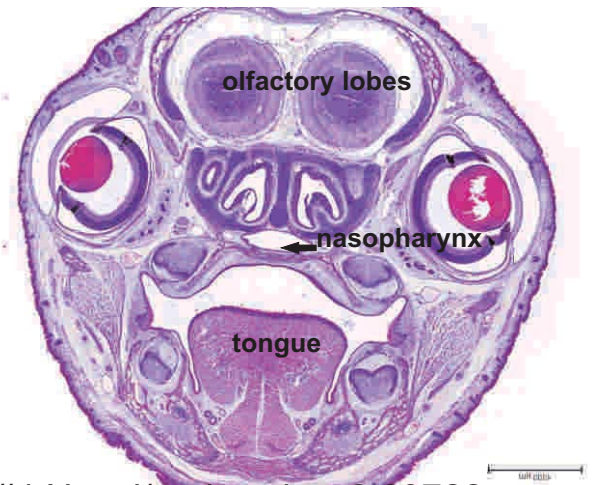

#4 Nasal/oral cavity x2 29722

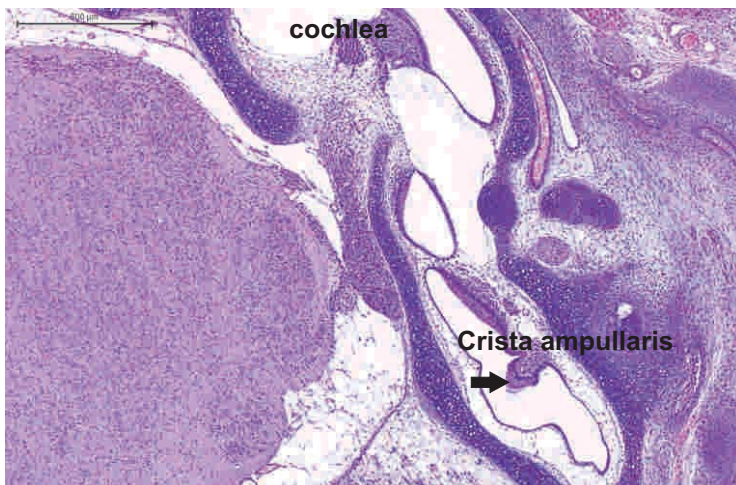

#4 Inner ear x10 29740
